# Supplementary material for: Occurrence of Pseudomonas spp. in Raw Vegetables: Molecular and Phenotypical Analysis of Their Antimicrobial Resistance and Virulence-Related Traits
Source: MDPI journal article supplement (doi:10.3390/ijms222312626), 2021-11-23
Supplement: s1 [file s1]

**Occurrence of *Pseudomonas* spp. in raw vegetables: molecular and phenotypical analysis of their antimicrobial resistance and virulence-related traits**

Lidia Ruiz-Roldán<sup>1,a</sup>; Beatriz Rojo-Bezares<sup>1</sup>; Carmen Lozano<sup>1,b</sup>; María López<sup>1</sup>; Gabriela Chichón<sup>1</sup>; Carmen Torres<sup>2</sup>; Yolanda Sáenz<sup>1\*</sup>

<sup>1</sup> Centro de Investigación Biomédica de La Rioja (CIBIR), C/ Piqueras 98, 26006, Logroño, Spain

<sup>2</sup> Área de Bioquímica y Biología Molecular, Universidad de La Rioja, C/Madre de Dios, 51, 26006, Logroño, Spain

<sup>a</sup> Present address: Joint Research Unit "Infection and Public Health" FISABIO-University of Valencia, Institute for Integrative Systems Biology I2SysBio (CSIC-UV), Av. de Catalunya, 21, 46020 Valencia, Spain

<sup>b</sup> Present address: Área de Bioquímica y Biología Molecular, Universidad de La Rioja, C/ Madre de Dios 51, 26006, Logroño, Spain

**Table S1.** Positive samples for *Pseudomonas* spp. isolates, including their antimicrobial resistance phenotype and Pulsed-Field Gel Electrophoresis (PFGE) patterns.

| Origin  | Sample Name | Species (N° of isolates)  | Strain       | Resistance phenotype <sup>a</sup> | PFGE Pattern |
|---------|-------------|---------------------------|--------------|-----------------------------------|--------------|
| Lettuce | AV2         | <i>P. mendocina</i>       | <b>Ps714</b> | ATM                               | P38          |
|         |             | <i>P. putida</i>          | <b>Ps715</b> | ATM                               | P64          |
|         |             | <i>P. mendocina</i> (2)   | <b>Ps716</b> | Susceptible                       | P37          |
|         |             | <i>P. mendocina</i>       | <b>Ps731</b> | Susceptible                       | P41          |
|         | AV16        | <i>P. mendocina</i>       | <b>Ps725</b> | Susceptible                       | P40          |
|         |             | <i>P. aeruginosa</i> (2)  | <b>Ps733</b> | Susceptible <sup>†</sup>          | P1           |
|         | AV20        | <i>P. aeruginosa</i>      | <b>Ps734</b> | Susceptible <sup>†</sup>          | P12          |
|         |             | <i>P. alcaligenes</i>     | <b>Ps735</b> | DOR                               | P114         |
|         |             | <i>P. mendocina</i>       | <b>Ps736</b> | Susceptible                       | P42          |
|         | AV21        | <i>P. otitidis</i>        | <b>Ps737</b> | DOR                               | P115         |
|         |             | <i>P. mendocina</i>       | <b>Ps738</b> | Susceptible                       | P43          |
|         | AV32        | <i>P. putida</i>          | <b>Ps729</b> | ATM                               | P67          |
|         | AV39        | <i>P. plecoglossicida</i> | <b>Ps730</b> | ATM                               | P113         |
|         |             | <i>P. mendocina</i>       | <b>Ps746</b> | ATM                               | P44          |
|         | AV46        | <i>P. mendocina</i>       | <b>Ps748</b> | Susceptible                       | P45          |
|         |             | <i>P. mendocina</i>       | <b>Ps749</b> | Susceptible                       | P46          |
|         | AV56        | <i>P. plecoglossicida</i> | <b>Ps755</b> | ATM                               | P119         |
|         | AV65        | <i>P. aeruginosa</i>      | <b>Ps760</b> | Susceptible <sup>†</sup>          | P24          |
|         |             | <i>P. mendocina</i>       | <b>Ps761</b> | ATM                               | P47          |
|         | AV75        | <i>P. plecoglossicida</i> | <b>Ps770</b> | ATM                               | P122         |
|         | AV76        | <i>P. mendocina</i>       | <b>Ps771</b> | Susceptible                       | P49          |
|         |             | <i>P. putida</i>          | <b>Ps772</b> | ATM                               | P79          |
|         |             | <i>P. putida</i>          | <b>Ps773</b> | Susceptible                       | P80          |
|         |             | <i>P. aeruginosa</i> (2)  | <b>Ps775</b> | Susceptible <sup>†</sup>          | P4           |
|         |             | <i>P. mendocina</i>       | <b>Ps776</b> | Susceptible                       | P63          |
|         |             | <i>P. mendocina</i>       | <b>Ps782</b> | Susceptible                       | P50          |
|         | AV86        | <i>P. plecoglossicida</i> | <b>Ps783</b> | ATM                               | P125         |
|         |             | <i>P. aeruginosa</i>      | <b>Ps786</b> | Susceptible <sup>†</sup>          | P26          |
|         | AV97        | <i>P. aeruginosa</i>      | <b>Ps794</b> | Susceptible <sup>†</sup>          | P8           |
|         |             | <i>P. aeruginosa</i>      | <b>Ps795</b> | Susceptible <sup>†</sup>          | P9           |
|         | AV105       | <i>P. mendocina</i> (2)   | <b>Ps799</b> | Susceptible                       | P93          |
|         | AV111       | <i>P. aeruginosa</i> (2)  | <b>Ps805</b> | Susceptible <sup>†</sup>          | P10          |
|         |             | <i>P. mendocina</i>       | <b>Ps806</b> | Susceptible                       | P55          |
|         |             | <i>P. mendocina</i>       | <b>Ps807</b> | Susceptible                       | P56          |
|         | AV117       | <i>P. putida</i>          | <b>Ps877</b> | ATM                               | P94          |
|         | AV130       | <i>P. plecoglossicida</i> | <b>Ps900</b> | ATM                               | P133         |

| Origin     | Sample Name | Species (N° of isolates)  | Strain       | Resistance phenotype <sup>a</sup>    | PFGE Pattern |
|------------|-------------|---------------------------|--------------|--------------------------------------|--------------|
| Cucumber   | AV8         | <i>P. aeruginosa</i>      | <b>Ps720</b> | Susceptible <sup>†</sup>             | P11          |
|            | AV14        | <i>P. alcaliphila</i>     | <b>Ps916</b> | Susceptible                          | P137         |
|            | AV18        | <i>P. plecoglossicida</i> | <b>Ps727</b> | ATM                                  | P112         |
|            | AV34        | <i>P. plecoglossicida</i> | <b>Ps742</b> | ATM                                  | P117         |
|            |             | <i>P. putida</i>          | <b>Ps743</b> | ATM                                  | P70          |
|            | AV49        | <i>P. putida</i> (2)      | <b>Ps753</b> | ATM                                  | P73          |
|            | AV71        | <i>P. plecoglossicida</i> | <b>Ps763</b> | ATM                                  | P120         |
|            | AV93        | <i>P. monteilii</i>       | <b>Ps789</b> | ATM                                  | P126         |
|            | AV110       | <i>P. aeruginosa</i>      | <b>Ps804</b> | Susceptible <sup>†</sup>             | P30          |
|            |             | <i>P. putida</i>          | <b>Ps843</b> | Susceptible                          | P91          |
|            | AV112       | <i>P. putida</i>          | <b>Ps873</b> | PIP, ATM                             | P92          |
|            |             | <i>P. putida</i>          | <b>Ps874</b> | ATM                                  | P92          |
|            |             | <i>P. putida</i>          | <b>Ps895</b> | MEM                                  | P92          |
|            |             | <i>P. plecoglossicida</i> | <b>Ps896</b> | ATM                                  | P132         |
| Zucchini   | AV11        | <i>P. putida</i>          | <b>Ps723</b> | Susceptible                          | P66          |
|            | AV29        | <i>P. putida</i>          | <b>Ps740</b> | ATM                                  | P69          |
|            | AV70        | <i>P. putida</i>          | <b>Ps762</b> | ATM                                  | P76          |
|            | AV94        | <i>P. putida</i>          | <b>Ps790</b> | ATM                                  | P86          |
|            | AV103       | <i>P. putida</i>          | <b>Ps841</b> | Susceptible                          | P88          |
|            |             | <i>P. monteilii</i>       | <b>Ps871</b> | Susceptible                          | P129         |
|            |             | <i>P. putida</i>          | <b>Ps872</b> | ATM                                  | P89          |
|            | AV116       | <i>P. fluorescens</i>     | <b>Ps876</b> | CAZ, IPM, MEM, ATM, DOR <sup>†</sup> | P130         |
|            | AV133       | <i>P. aeruginosa</i> (2)  | <b>Ps848</b> | Susceptible <sup>†</sup>             | P17          |
|            |             | <i>P. aeruginosa</i> (2)  | <b>Ps883</b> | Susceptible <sup>†</sup>             | P32          |
|            | AV139       | <i>P. putida</i>          | <b>Ps885</b> | Susceptible                          | P99          |
|            |             | <i>P. monteilii</i>       | <b>Ps910</b> | ATM                                  | P136         |
|            |             | <i>P. aeruginosa</i> (2)  | <b>Ps854</b> | Susceptible <sup>†</sup>             | P20          |
|            |             | <i>P. aeruginosa</i>      | <b>Ps855</b> | Susceptible <sup>†</sup>             | P21          |
| Onion/Leek | AV3         | <i>P. monteilii</i>       | <b>Ps718</b> | ATM                                  | P109         |
|            | AV4         | <i>P. plecoglossicida</i> | <b>Ps719</b> | ATM                                  | P110         |
|            | AV36        | <i>P. putida</i>          | <b>Ps744</b> | Susceptible                          | P71          |
|            | AV62        | <i>P. putida</i>          | <b>Ps758</b> | ATM                                  | P74          |
|            | AV72        | <i>P. monteilii</i>       | <b>Ps765</b> | ATM                                  | P121         |
|            |             | <i>P. aeruginosa</i>      | <b>Ps764</b> | Susceptible <sup>†</sup>             | P25          |
|            | AV81        | <i>P. putida</i>          | <b>Ps780</b> | ATM                                  | P83          |
|            | AV120       | <i>P. putida</i>          | <b>Ps898</b> | ATM                                  | P104         |
| Potato     | AV17        | <i>P. plecoglossicida</i> | <b>Ps726</b> | ATM                                  | P111         |
|            | AV37        | <i>P. putida</i>          | <b>Ps745</b> | ATM                                  | P72          |
|            | AV61        | <i>P. aeruginosa</i>      | <b>Ps756</b> | Susceptible <sup>†</sup>             | P3           |

| Origin     | Sample Name | Species (N° of isolates)  | Strain       | Resistance phenotype <sup>a</sup> | PFGE Pattern |
|------------|-------------|---------------------------|--------------|-----------------------------------|--------------|
|            | AV63        | <i>P. aeruginosa</i>      | <b>Ps757</b> | Susceptible <sup>†</sup>          | P5           |
|            |             | <i>P. putida</i>          | <b>Ps759</b> | Susceptible                       | P75          |
|            | AV80        | <i>P. plecoglossicida</i> | <b>Ps777</b> | ATM                               | P123         |
|            |             | <i>P. putida</i>          | <b>Ps778</b> | ATM                               | P81          |
|            | AV85        | <i>P. putida</i>          | <b>Ps779</b> | Susceptible                       | P82          |
|            |             | <i>P. plecoglossicida</i> | <b>Ps781</b> | ATM                               | P124         |
|            | AV89        | <i>P. mendocina</i>       | <b>Ps784</b> | Susceptible                       | P51          |
|            |             | <i>P. putida</i>          | <b>Ps785</b> | Susceptible                       | P84          |
|            | AV96        | <i>P. aeruginosa</i>      | <b>Ps791</b> | Susceptible <sup>†</sup>          | P6           |
|            |             | <i>P. aeruginosa</i> (2)  | <b>Ps793</b> | Susceptible <sup>†</sup>          | P7           |
|            | AV100       | <i>P. putida</i>          | <b>Ps797</b> | Susceptible                       | P87          |
|            | AV109       | <i>P. chlororaphis</i>    | <b>Ps917</b> | Susceptible                       | P138         |
|            | AV118       | <i>P. putida</i> (2)      | <b>Ps879</b> | ATM                               | P95          |
|            |             | <i>P. putida</i>          | <b>Ps897</b> | ATM                               | P96          |
| Green bean | AV12        | <i>P. putida</i>          | <b>Ps732</b> | ATM                               | P68          |
|            | AV28        | <i>P. oryzihabitans</i>   | <b>Ps739</b> | Susceptible                       | P116         |
|            | AV73        | <i>P. putida</i>          | <b>Ps766</b> | ATM                               | P77          |
|            | AV98        | <i>P. aeruginosa</i>      | <b>Ps796</b> | MEM. ATM <sup>†</sup>             | P27          |
|            |             | <i>P. punonensis</i>      | <b>Ps840</b> | Susceptible                       | P128         |
|            | AV104       | <i>P. aeruginosa</i>      | <b>Ps798</b> | Susceptible <sup>†</sup>          | P28          |
|            | AV106       | <i>P. aeruginosa</i>      | <b>Ps801</b> | Susceptible <sup>†</sup>          | P29          |
|            |             | <i>P. putida</i>          | <b>Ps842</b> | ATM                               | P90          |
|            | AV138       | <i>P. aeruginosa</i> (2)  | <b>Ps851</b> | Susceptible <sup>†</sup>          | P18          |
|            |             | <i>P. aeruginosa</i>      | <b>Ps852</b> | Susceptible <sup>†</sup>          | P19          |
|            |             | <i>P. aeruginosa</i>      | <b>Ps884</b> | IPM <sup>†</sup>                  | P33          |
|            |             | <i>P. plecoglossicida</i> | <b>Ps886</b> | ATM                               | P131         |
|            | AV143       | <i>P. aeruginosa</i>      | <b>Ps837</b> | Susceptible <sup>†</sup>          | P15          |
|            |             | <i>P. putida</i> (2)      | <b>Ps911</b> | ATM                               | P100         |
|            | AV145       | <i>P. putida</i>          | <b>Ps891</b> | ATM                               | P102         |
| Chard      | AV10        | <i>P. mendocina</i>       | <b>Ps721</b> | ATM                               | P39          |
|            |             | <i>P. putida</i>          | <b>Ps722</b> | Susceptible                       | P65          |
|            | AV31        | <i>P. mendocina</i>       | <b>Ps728</b> | Susceptible                       | P108         |
|            |             | <i>P. mendocina</i>       | <b>Ps741</b> | ATM                               | P53          |
|            | AV40        | <i>P. plecoglossicida</i> | <b>Ps747</b> | ATM                               | P118         |
|            | AV47        | <i>P. aeruginosa</i> (3)  | <b>Ps752</b> | Susceptible <sup>†</sup>          | P2           |
|            | AV74        | <i>P. mendocina</i> (2)   | <b>Ps767</b> | Susceptible <sup>†</sup>          | P48          |
|            |             | <i>P. putida</i>          | <b>Ps768</b> | ATM                               | P78          |
|            | AV92        | <i>P. mendocina</i>       | <b>Ps787</b> | Susceptible                       | P52          |
|            |             | <i>P. putida</i>          | <b>Ps788</b> | ATM                               | P85          |

| Origin | Sample Name | Species (N° of isolates)  | Strain       | Resistance phenotype <sup>a</sup> | PFGE Pattern |
|--------|-------------|---------------------------|--------------|-----------------------------------|--------------|
|        | AV108       | <i>P. mendocina</i>       | <b>Ps802</b> | Susceptible                       | P54          |
|        |             | <i>P. plecoglossicida</i> | <b>Ps803</b> | ATM                               | P127         |
|        | AV115       | <i>P. putida</i>          | <b>Ps875</b> | ATM                               | P139         |
|        | AV122       | <i>P. aeruginosa</i> (2)  | <b>Ps845</b> | Susceptible <sup>†</sup>          | P16          |
|        |             | <i>P. putida</i>          | <b>Ps899</b> | ATM                               | P105         |
|        | AV132       | <i>P. aeruginosa</i>      | <b>Ps846</b> | Susceptible <sup>†</sup>          | P22*         |
|        |             | <i>P. putida</i>          | <b>Ps880</b> | ATM                               | P97          |
|        |             | <i>P. putida</i>          | <b>Ps881</b> | ATM                               | P98          |
|        |             | <i>P. monteilii</i>       | <b>Ps901</b> | ATM                               | P134         |
|        |             | <i>P. mendocina</i>       | <b>Ps902</b> | ATM                               | P57          |
|        |             | <i>P. putida</i>          | <b>Ps903</b> | ATM                               | P106         |
|        | AV137       | <i>P. aeruginosa</i>      | <b>Ps849</b> | Susceptible <sup>†</sup>          | P22*         |
|        |             | <i>P. mendocina</i>       | <b>Ps904</b> | Susceptible                       | P58          |
|        |             | <i>P. mendocina</i>       | <b>Ps905</b> | Susceptible                       | P59          |
|        |             | <i>P. mendocina</i>       | <b>Ps906</b> | Susceptible                       | P60          |
|        |             | <i>P. plecoglossicida</i> | <b>Ps907</b> | ATM                               | P135         |
|        |             | <i>P. mendocina</i>       | <b>Ps908</b> | Susceptible                       | P61          |
|        |             | <i>P. mendocina</i>       | <b>Ps909</b> | Susceptible                       | P62          |
|        | AV144       | <i>P. aeruginosa</i>      | <b>Ps857</b> | Susceptible <sup>†</sup>          | P23          |
|        |             | <i>P. putida</i> (3)      | <b>Ps890</b> | ATM                               | P101         |
|        | AV146       | <i>P. aeruginosa</i> (2)  | <b>Ps838</b> | Susceptible <sup>†</sup>          | P13          |
|        |             | <i>P. aeruginosa</i>      | <b>Ps839</b> | IPM <sup>†</sup>                  | P14          |
|        |             | <i>P. aeruginosa</i>      | <b>Ps892</b> | Susceptible <sup>†</sup>          | P34          |
|        |             | <i>P. putida</i>          | <b>Ps912</b> | ATM                               | P107         |
|        | AV147       | <i>P. aeruginosa</i>      | <b>Ps858</b> | Susceptible <sup>†</sup>          | P31          |
|        |             | <i>P. aeruginosa</i>      | <b>Ps893</b> | Susceptible <sup>†</sup>          | P35          |
|        |             | <i>P. aeruginosa</i>      | <b>Ps913</b> | Susceptible <sup>†</sup>          | P36          |
|        |             | <i>P. putida</i>          | <b>Ps894</b> | ATM                               | P103         |

<sup>a</sup>Susceptible: This strain was susceptible to all antibiotics tested; CAZ, ceftazidime; ATM, aztreonam; IPM, imipenem; MEM, meropenem; DOR, doripenem; PIP, piperacillin.

<sup>†</sup> Presence of inducible AmpC phenotype

\* Ps846 and Ps849 showed the same PFGE pattern but they were recovered from different chard samples.

**Table S2.** Polymorphisms detected in porin OprD of the 37 *P. aeruginosa* strains isolated from food vegetables. *P. aeruginosa* PAO1 (GenBank accession number AE004091) was used as reference strain.

| Strains (N° total)                                                                                                                                                   | OprD Size | OprD Pattern <sup>a</sup> | Amino acid Changes                                                                                                                                 |
|----------------------------------------------------------------------------------------------------------------------------------------------------------------------|-----------|---------------------------|----------------------------------------------------------------------------------------------------------------------------------------------------|
| Ps851; Ps913 (2)                                                                                                                                                     | 443       | A                         | WT                                                                                                                                                 |
| Ps734; Ps752; Ps756; Ps757; Ps764; Ps775; Ps786; Ps791; Ps794; Ps795; Ps798; Ps801; Ps804; Ps805; Ps837; Ps838; Ps839; Ps845; Ps854; Ps857; Ps858; Ps892; Ps893 (23) | 441       | B                         | D43N; S57E; S59R; E202Q; I210A; E230K; S240T; N262T; A267S; A281G; K296Q; Q301E; R310G; V359L; Loop L7-short                                       |
| Ps796; Ps855; Ps883 (3)                                                                                                                                              | 443       | C                         | T103S; K115T; F170L; E185Q; P186G; V189T; R310E; A315G; G425A                                                                                      |
| Ps733 (1)                                                                                                                                                            | 443       | D                         | T103S; K115T; V127L; F170L; E185Q; P186G; V189T; R310E; A315G; G425A                                                                               |
| Ps793 (1)                                                                                                                                                            | 441       | E                         | V127L; E185Q; P186G; V189T; E202Q; I210A; E230K; S240T; N262T; T276A; A281G; K296Q; Q301E; R310E; G312R; A315G; L347M; Loop L7-short; S403A; Q424E |
| Ps720 (1)                                                                                                                                                            | 443       | F                         | T103S; K115T; F170L                                                                                                                                |
| Ps848 (1)                                                                                                                                                            | 443       | G                         | D43N; T103S; K115T; F170L                                                                                                                          |
| Ps760 (1)                                                                                                                                                            | 443       | H                         | V127L; F170L                                                                                                                                       |
| Ps846; Ps849 (2)                                                                                                                                                     | 443       | I                         | D43N                                                                                                                                               |
| Ps852 (1)                                                                                                                                                            | 443       | J                         | A293T                                                                                                                                              |
| Ps884 (1)                                                                                                                                                            |           | K                         | IS <i>Pal635</i> at nucleotide 561                                                                                                                 |

<sup>a</sup>WT: wild type, strains described the same amino acid pattern as *P. aeruginosa* PAO1 reference strain.

**Table S3.** Virulence patterns detected among the 37 *P. aeruginosa* strains isolated from different food vegetables.

| N° of strains | Amplification of genes |             |             |             |             |             |             |             |             |              |             |             |             |             |                | Virulence pattern |
|---------------|------------------------|-------------|-------------|-------------|-------------|-------------|-------------|-------------|-------------|--------------|-------------|-------------|-------------|-------------|----------------|-------------------|
|               | <i>exoU</i>            | <i>exoS</i> | <i>exoY</i> | <i>exoT</i> | <i>exlA</i> | <i>exoA</i> | <i>lasA</i> | <i>lasB</i> | <i>aprA</i> | <i>rhlAB</i> | <i>rhlC</i> | <i>rhlI</i> | <i>rhlR</i> | <i>lasI</i> | <i>lasR</i>    |                   |
| 23            | -                      | +           | +           | +           | -           | +           | +           | +           | +           | +            | +           | +           | +           | +           | +              | I                 |
| 1             | -                      | +           | +           | +           | -           | +           | +           | +           | +           | +            | +           | +           | +           | +           | + <sup>a</sup> | IIa               |
| 1             | -                      | +           | +           | +           | -           | +           | +           | +           | +           | +            | +           | +           | +           | +           | + <sup>b</sup> | IIb               |
| 1             | -                      | +           | +           | +           | -           | +           | +           | +           | +           | +            | +           | +           | +           | +           | + <sup>c</sup> | IIc               |
| 2             | -                      | +           | -           | +           | -           | +           | +           | +           | +           | +            | +           | +           | +           | +           | +              | III               |
| 3             | -                      | +           | +           | +           | -           | +           | +           | +           | +           | +            | +           | +           | +           | -           | -              | IV                |
| 2             | +                      | -           | +           | +           | -           | +           | +           | +           | +           | +            | +           | +           | +           | +           | +              | V                 |
| 1             | +                      | -           | -           | +           | -           | +           | +           | +           | +           | +            | +           | +           | +           | +           | + <sup>d</sup> | VI                |
| 2             | -                      | -           | +           | +           | -           | +           | +           | +           | +           | +            | +           | +           | +           | +           | +              | VII               |
| 1             | +                      | -           | +           | +           | -           | -           | +           | +           | +           | +            | +           | +           | +           | +           | +              | VIII              |

<sup>a</sup> *lasR* gene truncated by *IS1411* element.

<sup>b</sup> *lasR* gene truncated by *ISPst7* element.

<sup>c</sup> *lasR* gene of 647 bp instead of 720 bp.

<sup>d</sup> *lasR* gene truncated by *ISPre2* element.

(A)

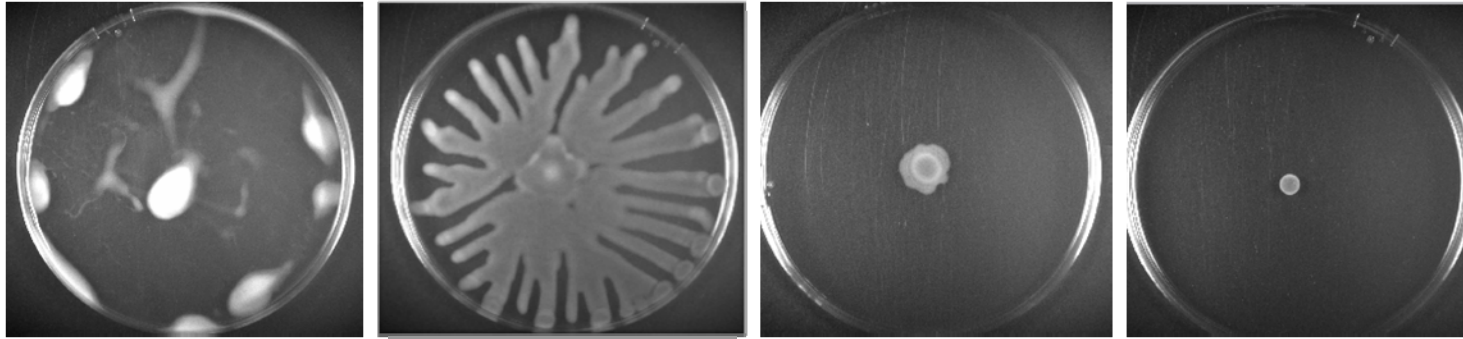

(B)

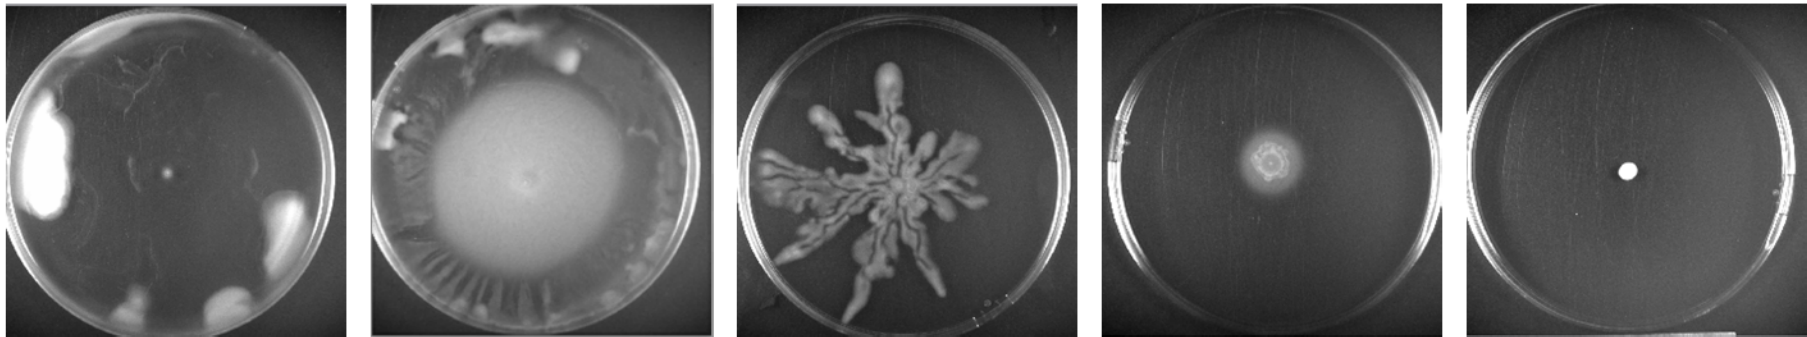

**Figure S1.** Different swarming (A) and swimming (B) motility patterns detected in the 37 *P. aeruginosa* strains.



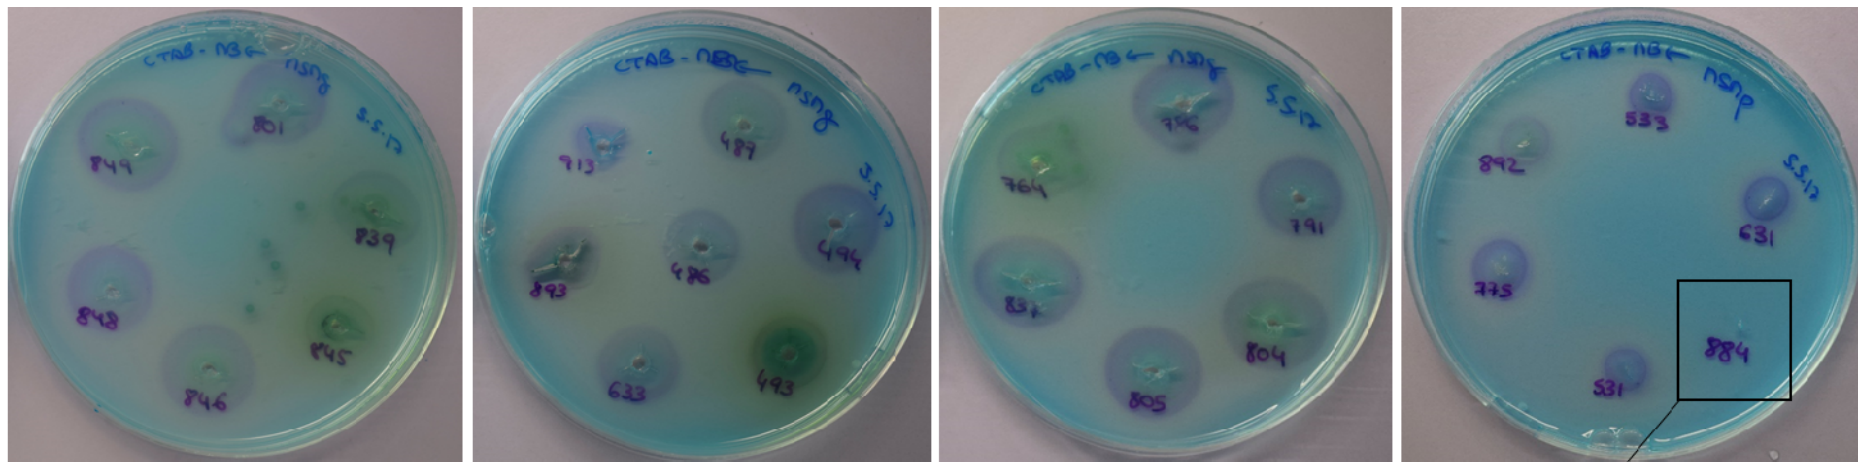

No rhamnolipids production

**Figure S2.** Rhamnolipids production in *P. aeruginosa* strains. The experiment was carried out in Cetyl Trimethylammonium Bromide – Methylene Blue (CTAB-MB) agar plates. Ps884 strain (square) did not show rhamnolipids production.
